# Supplementary material for: Putative Juvenile Terrorists: The Relationship between Multiple Traumatization, Mental Health, and Expectations for Reintegration among Islamic State Recruited Adolescent and Young Adult Fighters
Source: Research Square preprint supplement (doi:10.21203/rs.3.rs-1733841/v1), 2022-06-21
Supplement: Supplementary file 1 [file 23788fe444bbe83cc7c08cfd.docx]

Perpetration Events Checklist

| **Perpetration Events** | | | |
| --- | --- | --- | --- |
| 31. | Have you been extensively trained by ISIS to be a fighter? | ☐ Yes | ☐ No |
| 32. | Were you participated in combat? | ☐ Yes | ☐ No |
| 33. | Have you physically assaulted anyone? | ☐ Yes | ☐ No |
| 34. | Have you threatened someone with a weapon? | ☐ Yes | ☐ No |
| 35. | Have you injured someone with a weapon? | ☐ Yes | ☐ No |
| 36. | Have you killed others? | ☐ Yes | ☐ No |
| 37. | Have you sexually assaulted others? | ☐ Yes | ☐ No |
| 38. | Have you raped others? | ☐ Yes | ☐ No |
| 39. | Have you tortured others? | ☐ Yes | ☐ No |
| 40. | Have you punished others (i.e. destroying other people’s belonging, or roughing people up for not complying with ISIS orders)? | ☐ Yes | ☐ No |
| 41. | Have you violently checked other people’s homes? | ☐ Yes | ☐ No |
| 42. | Have you stood in checkpoints in combat areas? | ☐ Yes | ☐ No |

Rezhna Mohammed and Frank Neuner

Now, I will be reading some items for things you might have or might have not done in the past, if the item applies to you say yes, and if it doesn’t say no. Please remember that anything you share with me is confidential and it will not in any way impact you here in the prison.
